# Supplementary material for: Spherical 3-nitro-1,2,4-triazol-5-one (NTO) based melt-cast compositions: heralding a new era of shock insensitive energetic materials
Source: Royal Society of Chemistry journal article supplement (doi:10.1039/c5ra19010j), 2015-01-01
Supplement: c5ra19010j1.pdf [file c5ra19010j1.pdf]

## Supporting Information

**Table S1 Toxicological Information of Studied Explosives**

| Compound | Acute Toxicity: LD <sub>50</sub> (Oral) |             | Reference                                                                                                                          |
|----------|-----------------------------------------|-------------|------------------------------------------------------------------------------------------------------------------------------------|
|          | Mice                                    | Rats        |                                                                                                                                    |
| TNT      | 660 mg/kg                               | 607 mg/kg   | Journal of Toxicology and Environmental Health. Vol. 9, Pg. 565, 1982; International Journal of Toxicology. Vol. 19, Pg. 169, 2000 |
| RDX      | 59 mg/kg                                | 100 mg/kg   | National Technical Information Service. Vol. AD-A092-531; Toxicology and Applied Pharmacology. Vol. 39, Pg. 531, 1977              |
| NTO      | >5000 mg/kg                             | >5000 mg/kg | M. W. Smith, M. D. Cliff, Aeronautical and Maritime Research Laboratory, DSTO-TR-0796                                              |

In viva study results show that NTO has LD<sub>50</sub> values for oral ingestion of more than 5g/kg in mice and rats and hence it is non-toxic to mice and rats compared to others. Among the three, RDX is more toxic and the developed composition based on NTO-TNT will be relatively much less toxic compared to RDX-TNT in toxicological aspects (Ref: *Environmental toxicology and chemistry*, 2015, **34**, 873).

### Electrostatic Discharge Sensitivity

ESD data of NTO, TNT and RDX are below given

| Compound | ESD (J) | Reference                                                                                                                           |
|----------|---------|-------------------------------------------------------------------------------------------------------------------------------------|
| TNT      | 0.138   | M. W. Smith, M. D. Cliff, Aeronautical and Maritime Research Laboratory, DSTO-TR-0796; M. D. Cliff, M. W. Smith, DSTO-TR-0998, 2000 |
| NTO      | >4.5    |                                                                                                                                     |
| RDX      | 0.45    |                                                                                                                                     |

From the Table it can be inferred that NTO is much insensitive than RDX and hence, it can be understood that SNT0/TNT composition shall be insensitive than RDX/TNT (as these were physical mixtures).

## Figures

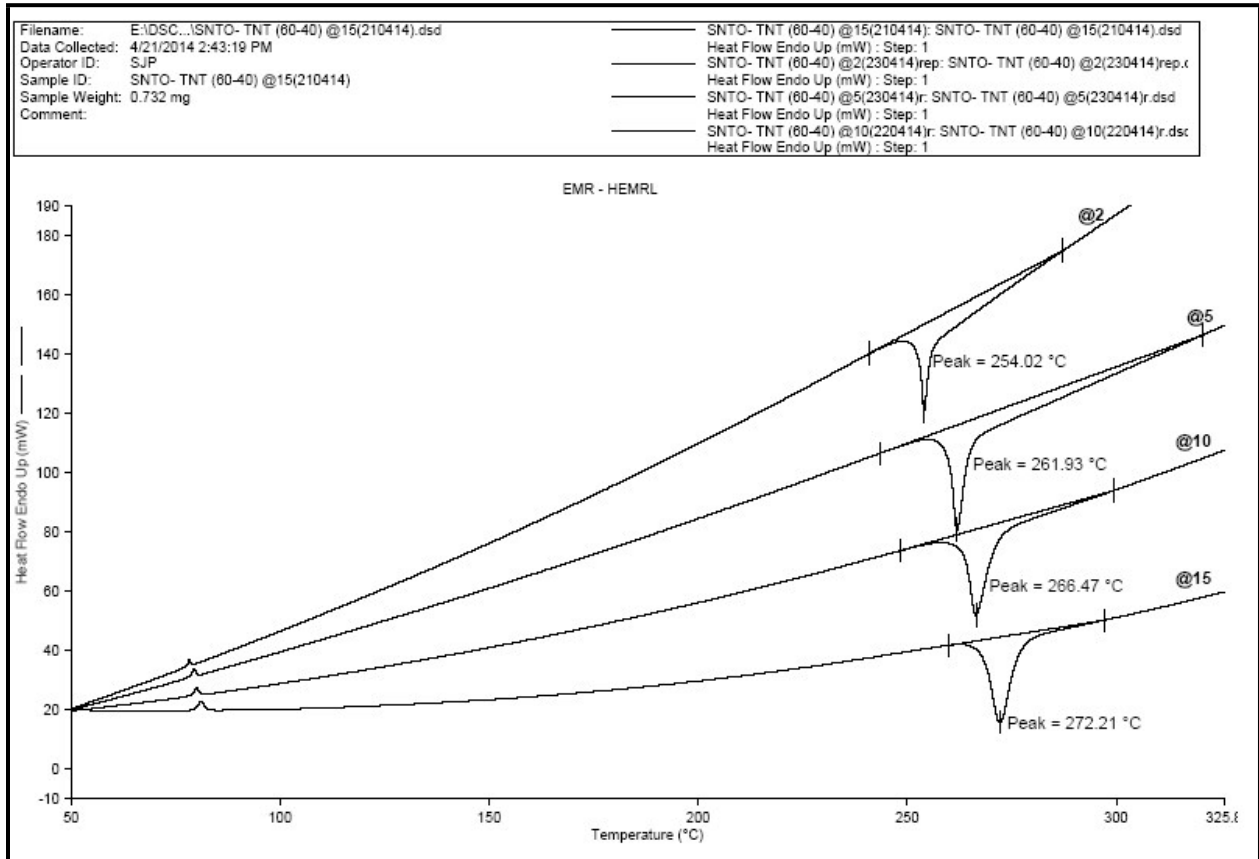

**Fig. S1 DSC thermograms of Spherical NTO/TNT (60:40) at different heating rates**

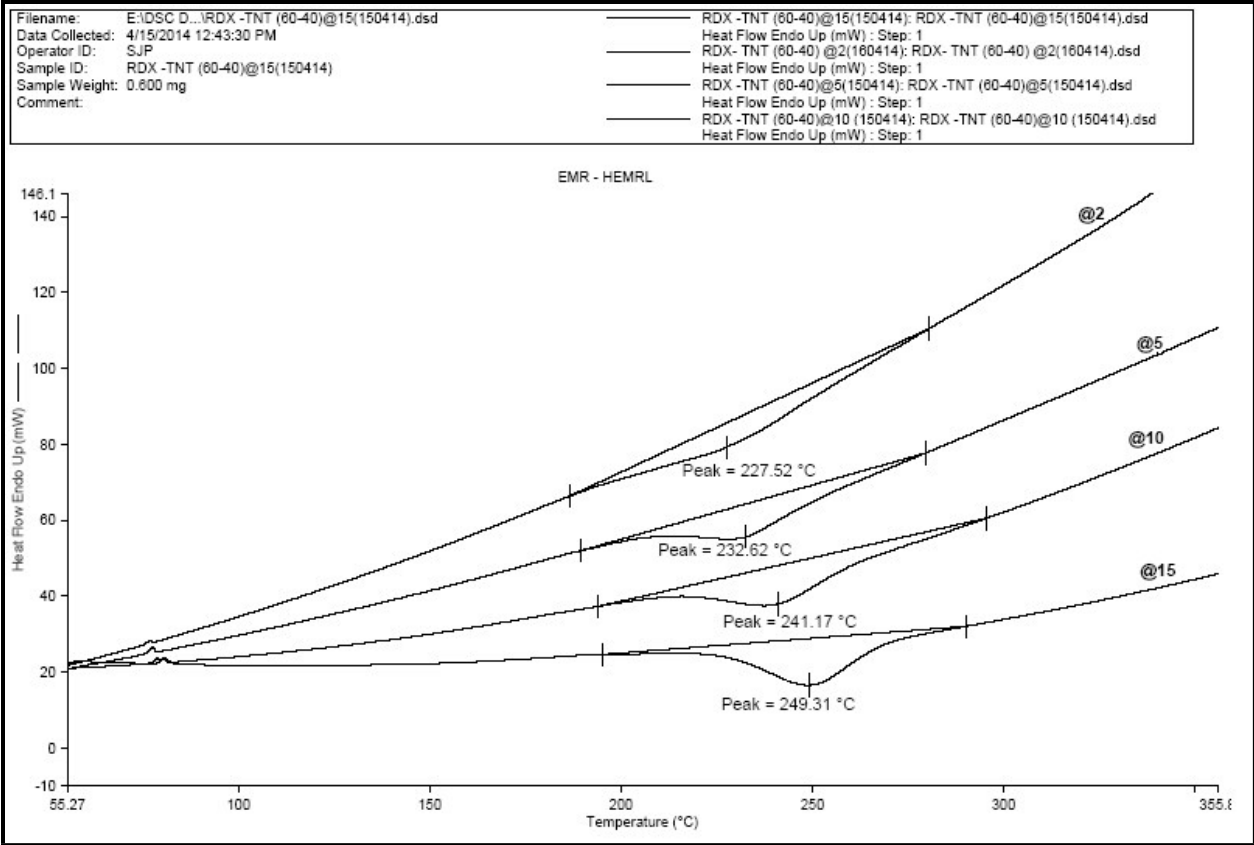

**Fig. S2 DSC thermograms of RDX/TNT (60:40) at different heating rates**
